# Supplementary material for: Quantification capabilities of N2 MICAP-MS with solution nebulization and aerosol desolvation
Source: Royal Society of Chemistry journal article supplement (doi:10.1039/d4ja00058g), 2024-01-01
Supplement: d4ja00058g1.pdf [file d4ja00058g1.pdf]

## Supplementary Information

# Quantification Capabilities of N<sub>2</sub> MICAP-MS with Solution Nebulization and Aerosol Desolvation

Monique Kuonen, Bodo Hattendorf and Detlef Günther\*

\*Correspondence: Detlef Günther, E-mail: guenther@inorg.chem.ethz.ch, Laboratory of Inorganic Chemistry, Department of Chemistry and Applied Biosciences, ETH Zurich, Vladimir – Prelog – Weg 1, 8093 Zurich, Switzerland

The following supplementary information supports the corresponding paper with additional figures (Figure S1 – S6) and tables (Table S1 – S8).

### List of Figures

|    |                                                                     |      |
|----|---------------------------------------------------------------------|------|
| S1 | Overview of contained certified elements in reference samples ..... | SI-2 |
| S2 | Enhancement due to solvent load .....                               | SI-3 |
| S3 | Quantification of SLRS-6 with solution nebulization .....           | SI-8 |
| S4 | Quantification of SLRS-6 with desolvation.....                      | SI-8 |
| S5 | Quantification of SLRS-6 with solution nebulization .....           | SI-9 |
| S6 | Quantification of SLRS-6 with desolvation.....                      | SI-9 |

### List of Tables

|    |                                                                                    |      |
|----|------------------------------------------------------------------------------------|------|
| S1 | Mass fractions of the reference samples and the multi-element stock solution ..... | SI-2 |
| S2 | Enhancement and suppression due to solvent load .....                              | SI-3 |
| S3 | Plasma gas temperatures at fixed nebulizer gas flow rate.....                      | SI-4 |
| S4 | Ca matrix tolerance of the N <sub>2</sub> MICAP-MS .....                           | SI-4 |
| S5 | Abundance normalized sensitivities for selected elements .....                     | SI-5 |
| S6 | Limits of Detection and Limits of Quantification .....                             | SI-5 |
| S7 | Quantification overview for NIST 1643f with twofold dilution.....                  | SI-6 |
| S8 | Quantification overview for NIST 1643f with tenfold dilution .....                 | SI-7 |

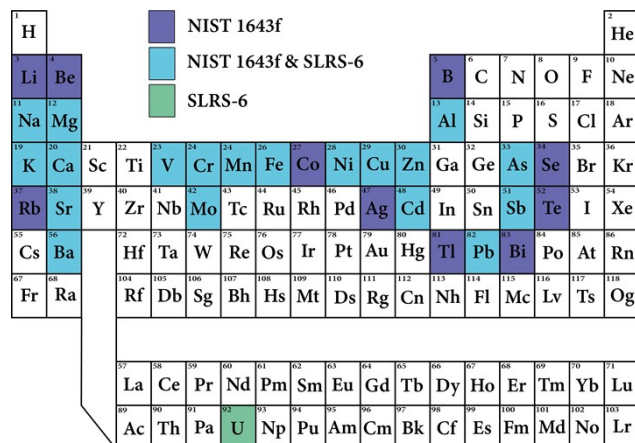

Figure S1: An overview of the certified elements contained in the two water reference materials. The colours in the periodic table indicate which elements were certified for NIST SRM 1643f (dark blue), SLRS-6 (green) or both (light blue).

Table S1: Certified reference mass fraction values for SLRS-6 and NIST 1643f are given with the mass fractions of the multi-element stock solution (MES), which was used to prepare the external calibration by diluting it 4 – 400-fold. The mass fractions in the MES were chosen so that its 20-fold dilution results in similar mass fractions to those of the SLRS-6, NIST 1643f, or the five-fold dilution thereof. For elements that had at least one order of magnitude difference in the mass fractions of the two water reference materials SLRS-6 and NIST 1643f, additional multi-element solutions were prepared that matched the reference samples. All mass fractions are reported in  $\mu\text{g kg}^{-1}$ .

| Element | SLRS-6              |                       | NIST 1643f |                | MES    |
|---------|---------------------|-----------------------|------------|----------------|--------|
| Li      | - <sup>a</sup>      |                       | 16.4       | ± 0.4          | 336    |
| Be      | 0.0066 <sup>b</sup> | ± 0.0022 <sup>b</sup> | 13.53      | ± 0.11         | 272    |
| B       | - <sup>a</sup>      |                       | 150        | ± 7            | 10000  |
| Na      | 2770                | ± 220                 | 18640      | ± 240          | 64500  |
| Mg      | 2140                | ± 60                  | 7380       | ± 60           | 35600  |
| Al      | 33.9                | ± 2.2                 | 132.5      | ± 1.2          | 600    |
| K       | 650                 | ± 50                  | 1913       | ± 9            | 9848   |
| Ca      | 8770                | ± 200                 | 29140      | ± 300          | 144300 |
| V       | 0.352               | ± 0.006               | 35.71      | ± 0.27         | 74.8   |
| Cr      | 0.252               | ± 0.012               | 18.32      | ± 0.1          | 39.3   |
| Mn      | 2.12                | ± 0.1                 | 36.7       | ± 0.6          | 93.7   |
| Fe      | 85                  | ± 4                   | 92.5       | ± 0.8          | 1770   |
| Co      | 0.053 <sup>b</sup>  | ± 0.012 <sup>b</sup>  | 25.05      | ± 0.17         | 495    |
| Ni      | 0.617               | ± 0.022               | 59.2       | ± 1.4          | 119    |
| Cu      | 24                  | ± 1.8                 | 21.44      | ± 0.7          | 451    |
| Zn      | 1.76                | ± 0.12                | 73.7       | ± 1.7          | 164    |
| As      | 0.57                | ± 0.08                | 56.8       | ± 0.4          | 119    |
| Se      | - <sup>a</sup>      |                       | 11.58      | ± 0.08         | 239    |
| Rb      | - <sup>a</sup>      |                       | 12.51      | ± 0.12         | 245    |
| Sr      | 40.7                | ± 0.3                 | 311        | ± 18           | 1020   |
| Mo      | 0.215               | ± 0.018               | 114.2      | ± 1.7          | 227    |
| Ag      | - <sup>a</sup>      |                       | 0.960      | ± 0.008        | 19.0   |
| Cd      | 0.0063              | ± 0.0014              | 5.83       | ± 0.13         | 118    |
| Sb      | 0.338               | ± 0.006               | 54.9       | ± 0.4          | 109    |
| Te      | - <sup>a</sup>      |                       | 0.967      | ± 0.008        | 18.9   |
| Ba      | 14.3                | ± 0.5                 | 513        | ± 7            | 1150   |
| Tl      | - <sup>a</sup>      |                       | 6.82       | ± 0.03         | 139    |
| Pb      | 0.17                | ± 0.026               | 18.30      | ± 0.08         | 39.0   |
| Bi      | - <sup>a</sup>      |                       | 12.50      | ± 0.10         | 247    |
| U       | 0.070               | ± 0.003               |            | - <sup>a</sup> | 1.38   |

<sup>a</sup> not available; <sup>b</sup> not certified

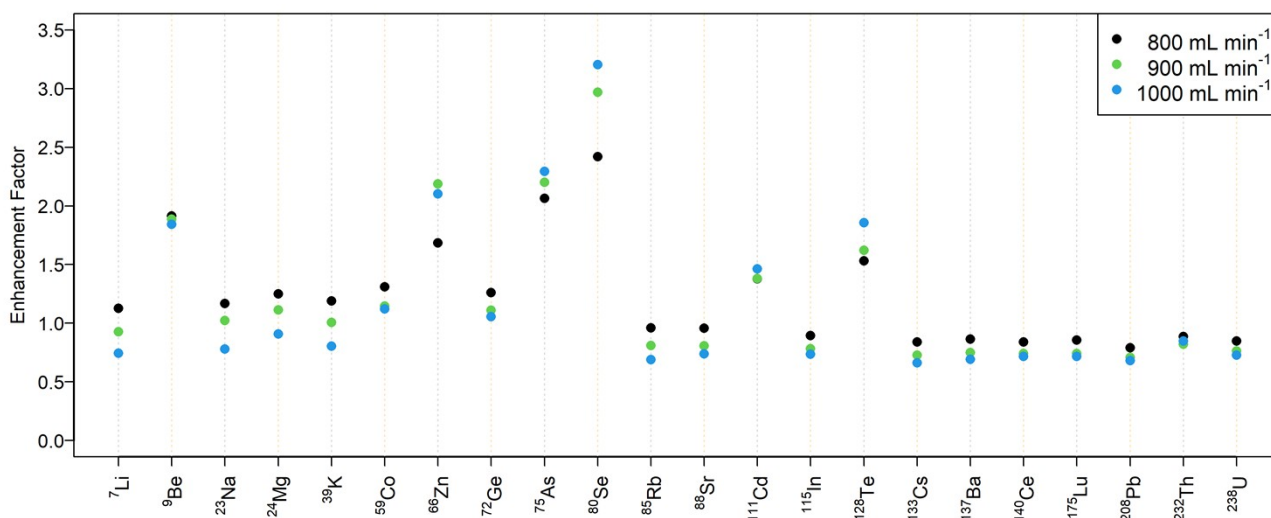

Figure S2: Enhancement and suppression of the desolvated aerosol signal intensity compared to the signal intensity when the desolvator was deactivated. Data is shown for nebulizer gas flow rates of 800 mL min<sup>-1</sup>, 900 mL min<sup>-1</sup> and 1000 mL min<sup>-1</sup>.

Table S2: Enhancement and suppression due to solvent load in dependence on the nebulizer gas flow rate. The ratio of the signal intensities from the setup with the activated to the deactivated desolvator is given for different nebulizer gas flow rates (reported in mL min<sup>-1</sup>).

| Isotope                                      | 800  | 825  | 850  | 875  | 900  | 925  | 950  | 975  | 1000 |
|----------------------------------------------|------|------|------|------|------|------|------|------|------|
| <sup>7</sup> Li <sup>+</sup>                 | 1.13 | 1.09 | 0.88 | 1.04 | 0.93 | 0.85 | 0.71 | 0.77 | 0.74 |
| <sup>9</sup> Be <sup>+</sup>                 | 1.91 | 1.87 | 1.76 | 1.81 | 1.89 | 1.90 | 1.68 | 1.89 | 1.84 |
| <sup>23</sup> Na <sup>+</sup>                | 1.17 | 1.00 | 1.01 | 1.07 | 1.02 | 0.97 | 0.82 | 0.83 | 0.78 |
| <sup>24</sup> Mg <sup>+</sup>                | 1.25 | 1.20 | 1.15 | 1.13 | 1.11 | 1.08 | 0.92 | 0.95 | 0.91 |
| <sup>39</sup> K <sup>+</sup>                 | 1.19 | 1.06 | 1.04 | 1.01 | 1.01 | 0.96 | 0.87 | 0.85 | 0.80 |
| <sup>59</sup> Co <sup>+</sup>                | 1.31 | 1.21 | 1.26 | 1.15 | 1.15 | 1.18 | 1.14 | 1.14 | 1.12 |
| <sup>66</sup> Zn <sup>+</sup>                | 1.68 | 1.73 | 1.77 | 2.21 | 2.19 | 2.39 | 2.15 | 2.02 | 2.10 |
| <sup>72</sup> Ge <sup>+</sup>                | 1.26 | 1.19 | 1.15 | 1.14 | 1.11 | 1.13 | 1.16 | 1.12 | 1.05 |
| <sup>75</sup> As <sup>+</sup>                | 2.06 | 1.98 | 2.07 | 2.15 | 2.20 | 2.15 | 2.36 | 2.31 | 2.29 |
| <sup>80</sup> Se <sup>+</sup>                | 2.42 | 2.67 | 2.90 | 2.91 | 2.97 | 3.07 | 3.21 | 3.13 | 3.20 |
| <sup>85</sup> Rb <sup>+</sup>                | 0.96 | 0.93 | 0.87 | 0.83 | 0.81 | 0.79 | 0.75 | 0.74 | 0.69 |
| <sup>88</sup> Sr <sup>+</sup>                | 0.96 | 0.94 | 0.89 | 0.85 | 0.81 | 0.82 | 0.78 | 0.78 | 0.74 |
| <sup>111</sup> Cd <sup>+</sup>               | 1.38 | 1.35 | 1.34 | 1.35 | 1.38 | 1.39 | 1.48 | 1.48 | 1.46 |
| <sup>115</sup> In <sup>+</sup>               | 0.89 | 0.85 | 0.85 | 0.80 | 0.78 | 0.78 | 0.76 | 0.75 | 0.74 |
| <sup>128</sup> Te <sup>+</sup>               | 1.53 | 1.53 | 1.58 | 1.60 | 1.62 | 1.64 | 1.79 | 1.76 | 1.86 |
| <sup>133</sup> Cs <sup>+</sup>               | 0.84 | 0.80 | 0.79 | 0.76 | 0.73 | 0.73 | 0.70 | 0.67 | 0.66 |
| <sup>137</sup> Ba <sup>+</sup>               | 0.86 | 0.81 | 0.78 | 0.76 | 0.75 | 0.72 | 0.72 | 0.67 | 0.69 |
| <sup>140</sup> Ce <sup>+</sup>               | 0.84 | 0.83 | 0.80 | 0.78 | 0.74 | 0.74 | 0.71 | 0.72 | 0.72 |
| <sup>175</sup> Lu <sup>+</sup>               | 0.86 | 0.84 | 0.79 | 0.76 | 0.74 | 0.75 | 0.73 | 0.75 | 0.72 |
| <sup>208</sup> Pb <sup>+</sup>               | 0.79 | 0.78 | 0.75 | 0.72 | 0.71 | 0.70 | 0.71 | 0.67 | 0.68 |
| <sup>232</sup> Th <sup>+</sup>               | 0.89 | 0.82 | 0.87 | 0.79 | 0.82 | 0.81 | 0.83 | 0.85 | 0.85 |
| <sup>238</sup> U <sup>+</sup>                | 0.85 | 0.80 | 0.82 | 0.75 | 0.76 | 0.76 | 0.77 | 0.75 | 0.73 |
| <sup>14</sup> N <sup>16</sup> O <sup>+</sup> | 0.62 | 0.66 | 0.67 | 0.70 | 0.72 | 0.75 | 0.78 | 0.79 | 0.77 |

Table S3: Calculated plasma temperatures obtained from the pressure reduction method, the Longerich method, and the method from Houk and Praphairaksit (H&P). Temperatures were calculated for solution nebulization (SN) and desolvated (Des) sample introduction for both the N<sub>2</sub> MICAP and the Ar ICP at a nebulizer gas flow rate of 900 mL min<sup>-1</sup>.

| Method                                 | N <sub>2</sub> MICAP |          | Ar ICP   |          |
|----------------------------------------|----------------------|----------|----------|----------|
|                                        | SN                   | Des      | SN       | Des.     |
| Pressure reduction                     | 5'220 K              | 5'400 K  | 5'780 K  | 5'850 K  |
| Longerich                              | 12'850 K             | 16'400 K | 13'170 K | 12'460 K |
| H&P LaO <sup>+</sup> / La <sup>+</sup> | 6'350 K              | 6'790 K  | 6'620 K  | 6'950 K  |
| H&P CeO <sup>+</sup> / Ce <sup>+</sup> | 5'910 K              | 6'250 K  | 6'060 K  | 6'400 K  |
| H&P PrO <sup>+</sup> / Pr <sup>+</sup> | 6'200 K              | 6'580 K  | 6'080 K  | 6'390 K  |

Table S4: Ca matrix tolerance of the N<sub>2</sub> MICAP-MS. The signal suppression of a solution with 100 mg kg<sup>-1</sup> compared to a solution with 1 mg kg<sup>-1</sup> is shown for solution nebulization (SN) and desolvated sample introduction (Des). Suppression values are given for raw ion signals and after normalization to <sup>115</sup>In as internal standard (w. IS).

| Isotope                        | SN     | SN w. IS | Des     | Des w. IS |
|--------------------------------|--------|----------|---------|-----------|
| <sup>7</sup> Li <sup>+</sup>   | - 24 % | - 13 %   | - 72 %  | - 41 %    |
| <sup>9</sup> Be <sup>+</sup>   | - 02 % | + 15 %   | - 60 %  | - 18 %    |
| <sup>11</sup> B <sup>+</sup>   | - 07 % | + 05 %   | + 165 % | + 436 %   |
| <sup>24</sup> Mg <sup>+</sup>  | - 21 % | - 11 %   | - 64 %  | - 27 %    |
| <sup>27</sup> Al <sup>+</sup>  | - 29 % | - 19 %   | - 61 %  | - 20 %    |
| <sup>51</sup> V <sup>+</sup>   | - 13 % | - 02 %   | - 57 %  | - 12 %    |
| <sup>52</sup> Cr <sup>+</sup>  | - 18 % | - 07 %   | - 59 %  | - 16 %    |
| <sup>55</sup> Mn <sup>+</sup>  | - 20 % | - 10 %   | - 60 %  | - 20 %    |
| <sup>56</sup> Fe <sup>+</sup>  | - 14 % | + 11 %   | - 55 %  | - 08 %    |
| <sup>59</sup> Co <sup>+</sup>  | - 10 % | + 01 %   | - 57 %  | - 12 %    |
| <sup>60</sup> Ni <sup>+</sup>  | - 04 % | + 17 %   | - 53 %  | - 04 %    |
| <sup>63</sup> Cu <sup>+</sup>  | - 17 % | - 06 %   | - 58 %  | - 15 %    |
| <sup>66</sup> Zn <sup>+</sup>  | - 10 % | + 02 %   | - 52 %  | - 01 %    |
| <sup>71</sup> Ga <sup>+</sup>  | - 18 % | - 08 %   | - 56 %  | - 10 %    |
| <sup>75</sup> As <sup>+</sup>  | - 12 % | - 01 %   | - 51 %  | + 01 %    |
| <sup>80</sup> Se <sup>+</sup>  | - 15 % | - 04 %   | - 41 %  | + 20 %    |
| <sup>85</sup> Rb <sup>+</sup>  | - 25 % | - 15 %   | - 54 %  | - 06 %    |
| <sup>98</sup> Mo <sup>+</sup>  | - 07 % | + 05 %   | - 51 %  | + 01 %    |
| <sup>107</sup> Ag <sup>+</sup> | - 15 % | - 04 %   | - 53 %  | - 02 %    |
| <sup>111</sup> Cd <sup>+</sup> | - 04 % | + 09 %   | - 51 %  | + 02 %    |
| <sup>128</sup> Te <sup>+</sup> | - 02 % | + 12 %   | - 46 %  | + 12 %    |
| <sup>137</sup> Ba <sup>+</sup> | - 16 % | - 05 %   | - 51 %  | + 01 %    |
| <sup>208</sup> Pb <sup>+</sup> | - 16 % | - 06 %   | - 54 %  | - 07 %    |
| <sup>209</sup> Bi <sup>+</sup> | - 10 % | + 01 %   | - 53 %  | - 04 %    |
| <sup>238</sup> U <sup>+</sup>  | - 06 % | + 06 %   | - 54 %  | - 05 %    |

Table S5: Abundance normalized sensitivities for selected elements to demonstrate the enhancement observed with aerosol desolvation. Sensitivities are given in cps  $\mu\text{g}^{-1}$  kg for two Ca matrix mass fractions to see the decrease in enhancement with higher mass load.

| Elements        | 1 mg kg <sup>-1</sup> Ca |         | 50 mg kg <sup>-1</sup> Ca |         |
|-----------------|--------------------------|---------|---------------------------|---------|
|                 | SN                       | Des     | SN                        | Des     |
| Li <sup>+</sup> | 830                      | 10'100  | 630                       | 4'000   |
| Co <sup>+</sup> | 8'150                    | 80'000  | 6'730                     | 43'700  |
| As <sup>+</sup> | 1'370                    | 14'500  | 1'150                     | 9'100   |
| Pb <sup>+</sup> | 21'300                   | 160'000 | 17'600                    | 92'000  |
| U <sup>+</sup>  | 25'500                   | 234'000 | 22'300                    | 137'000 |

Table S6: Limits of detection and limits of quantification for elements measured with solution nebulization and desolvation. The LODs and LOQs given in ng kg<sup>-1</sup> were determined from the slope of the external calibration for the quantification study and the respective blank measurement. The dilution factor has not been considered for the LOQs.

| Isotope                        | LODs |       | LOQs |        |
|--------------------------------|------|-------|------|--------|
|                                | SN   | Des   | SN   | Des    |
| <sup>7</sup> Li <sup>+</sup>   | 150  | 17    | 500  | 60     |
| <sup>9</sup> Be <sup>+</sup>   | 26   | 5     | 90   | 16     |
| <sup>11</sup> B <sup>+</sup>   | 80   | 4'000 | 250  | 12'000 |
| <sup>23</sup> Na <sup>+</sup>  | 240  | 400   | 800  | 1'400  |
| <sup>24</sup> Mg <sup>+</sup>  | 15   | 9     | 50   | 29     |
| <sup>27</sup> Al <sup>+</sup>  | 24   | 40    | 80   | 140    |
| <sup>39</sup> K <sup>+</sup>   | 9    | 180   | 30   | 600    |
| <sup>40</sup> Ca <sup>+</sup>  | 100  | 250   | 300  | 900    |
| <sup>51</sup> V <sup>+</sup>   | 1.5  | 0.6   | 5    | 1.9    |
| <sup>52</sup> Cr <sup>+</sup>  | 2.3  | 0.7   | 8    | 2.6    |
| <sup>55</sup> Mn <sup>+</sup>  | 1.0  | 0.3   | 3    | 1.1    |
| <sup>56</sup> Fe <sup>+</sup>  | 40   | 15    | 130  | 50     |
| <sup>59</sup> Co <sup>+</sup>  | 4    | 2.0   | 14   | 7      |
| <sup>60</sup> Ni <sup>+</sup>  | 20   | 3     | 70   | 11     |
| <sup>63</sup> Cu <sup>+</sup>  | 12   | 6     | 40   | 21     |
| <sup>66</sup> Zn <sup>+</sup>  | 30   | 23    | 100  | 80     |
| <sup>75</sup> As <sup>+</sup>  | 5    | 6     | 16   | 20     |
| <sup>80</sup> Se <sup>+</sup>  | 11   | 70    | 40   | 230    |
| <sup>85</sup> Rb <sup>+</sup>  | 1.9  | 0.8   | 6    | 2.5    |
| <sup>88</sup> Sr <sup>+</sup>  | 1.1  | 0.6   | 4    | 2.0    |
| <sup>98</sup> Mo <sup>+</sup>  | 2.6  | 9     | 9    | 29     |
| <sup>107</sup> Ag <sup>+</sup> | 2.7  | 2.7   | 9    | 9      |
| <sup>111</sup> Cd <sup>+</sup> | 13   | 3     | 40   | 11     |
| <sup>121</sup> Sb <sup>+</sup> | 1.6  | 1.0   | 5    | 3      |
| <sup>128</sup> Te <sup>+</sup> | 13   | 2.3   | 40   | 8      |
| <sup>137</sup> Ba <sup>+</sup> | 6.6  | 1.8   | 22   | 6      |
| <sup>205</sup> Tl <sup>+</sup> | 1.2  | 0.9   | 4    | 2.9    |
| <sup>208</sup> Pb <sup>+</sup> | 0.8  | 1.9   | 2.6  | 6      |
| <sup>209</sup> Bi <sup>+</sup> | 0.7  | 1.0   | 2.4  | 3      |
| <sup>238</sup> U <sup>+</sup>  | 0.3  | 0.1   | 1.1  | 0.4    |

Table S7: Quantification overview for NIST 1643f with twofold dilution for external calibration and standard addition using solution nebulization (SN) and desolvated sample introduction (Des). All values are reported in  $\mu\text{g kg}^{-1}$ .

| Quantified Isotope | Reference |        | SN Ext. Cal. |        | SN Std. Add. |        | Des Ext. Cal |        | Des Std. Add. |        |
|--------------------|-----------|--------|--------------|--------|--------------|--------|--------------|--------|---------------|--------|
|                    | mean      | 2SD    | mean         | 2SD    | mean         | 2SD    | mean         | 2SD    | mean          | 2SD    |
| <sup>7</sup> Li    | 16.4      | 0.4    | 18.0         | 0.6    | 16.3         | 0.8    | 15.8         | 0.5    | 17.3          | 0.6    |
| <sup>9</sup> Be    | 13.53     | 0.11   | 13.7         | 0.8    | 14.6         | 1.0    | 12.0         | 0.4    | 13.19         | 0.22   |
| <sup>11</sup> B    | 151       | 7      | 162          | 5      | 157          | 5      | (284)        |        | (78)          |        |
| <sup>23</sup> Na   | 18640     | 240    | 20700        | 400    | _b           |        | 17700        | 500    | _b            |        |
| <sup>24</sup> Mg   | 7380      | 60     | 8190         | 150    | _b           |        | 7050         | 240    | _b            |        |
| <sup>25</sup> Mg   | 7380      | 60     | 7990         | 150    | _b           |        | 7070         | 190    | _b            |        |
| <sup>27</sup> Al   | 132.5     | 1.2    | 141          | 3      | 146          | 4      | 126.6        | 2.6    | 130           | 4      |
| <sup>39</sup> K    | 1913      | 9      | 2010         | 50     | _b           |        | 1820         | 50     | _b            |        |
| <sup>40</sup> Ca   | 29140     | 300    | 30100        | 600    | _b           |        | _c           |        | _b            |        |
| <sup>41</sup> K    | 1913      | 9      | 1919         | 18     | _b           |        | 1790         | 60     | _b            |        |
| <sup>51</sup> V    | 35.71     | 0.27   | 35.7         | 0.6    | 38.9         | 0.6    | 34.2         | 0.4    | 37.8          | 0.3    |
| <sup>52</sup> Cr   | 18.3      | 0.1    | 18.4         | 0.3    | 17.9         | 0.6    | 18.0         | 0.4    | 19.40         | 0.20   |
| <sup>53</sup> Cr   | 18.3      | 0.1    | 18.0         | 0.6    | 18.38        | 0.22   | 17.8         | 0.5    | 19.2          | 0.4    |
| <sup>55</sup> Mn   | 36.8      | 0.6    | 36.0         | 0.6    | 36.7         | 0.8    | 35.0         | 1.2    | 34.0          | 0.6    |
| <sup>56</sup> Fe   | 92.5      | 0.8    | 100          | 3      | 95.9         | 1.8    | 90.1         | 3.0    | 87.5          | 1.2    |
| <sup>57</sup> Fe   | 92.5      | 0.8    | 185          | 5      | 266          | 5      | 147          | 10     | 155.6         | 2      |
| <sup>59</sup> Co   | 25.05     | 0.17   | 25.0         | 0.5    | 25.6         | 0.4    | 23.7         | 0.8    | 25.1          | 0.3    |
| <sup>60</sup> Ni   | 59.2      | 1.4    | 58.8         | 2.0    | 61.4         | 1.0    | 55.9         | 1.8    | 66.6          | 1.2    |
| <sup>62</sup> Ni   | 59.2      | 1.4    | 56.7         | 2.2    | 60.0         | 1.4    | 56.4         | 0.4    | 65.1          | 1.0    |
| <sup>63</sup> Cu   | 21.4      | 0.7    | 19.1         | 0.4    | 22.4         | 0.8    | 19.8         | 0.5    | 22.5          | 0.5    |
| <sup>64</sup> Zn   | 73.7      | 1.7    | 85.4         | 2.8    | 79.4         | 1.2    | 77.6         | 2.4    | 86.6          | 1.4    |
| <sup>65</sup> Cu   | 21.4      | 0.7    | 19.3         | 0.4    | 22.5         | 0.5    | 19.5         | 0.6    | 22.7          | 0.4    |
| <sup>66</sup> Zn   | 73.7      | 1.7    | 85           | 3      | 75.6         | 1.6    | 76.4         | 2.6    | 83.0          | 1.4    |
| <sup>75</sup> As   | 56.9      | 0.4    | 56.3         | 1.2    | 59.8         | 0.8    | 53.8         | 1.0    | 54.8          | 0.5    |
| <sup>78</sup> Se   | 11.58     | 0.08   | 11.2         | 0.8    | 11.6         | 0.8    | 11.43        | 0.24   | 12.4          | 0.4    |
| <sup>80</sup> Se   | 11.58     | 0.08   | 11.27        | 0.26   | 11.3         | 0.6    | 10.69        | 0.24   | 12.0          | 0.4    |
| <sup>85</sup> Rb   | 12.51     | 0.12   | 12.33        | 0.20   | 13.2         | 0.3    | 12.00        | 0.30   | 13.3          | 0.3    |
| <sup>88</sup> Sr   | 311       | 18     | 329          | 4      | 317          | 5      | 298          | 6      | 288.4         | 2.4    |
| <sup>95</sup> Mo   | 114.2     | 1.7    | 110.8        | 1.8    | 114.4        | 2.2    | 109          | 3      | 114.4         | 1.8    |
| <sup>98</sup> Mo   | 114.2     | 1.7    | 111.1        | 2.0    | 114.8        | 2.4    | 110          | 4      | 114.0         | 2.2    |
| <sup>107</sup> Ag  | 0.961     | 0.008  | 0.96         | 0.04   | 0.94         | 0.04   | 0.966        | 0.022  | 0.905         | 0.026  |
| <sup>109</sup> Ag  | 0.961     | 0.008  | 1.03         | 0.03   | 1.00         | 0.06   | 1.030        | 0.028  | 0.982         | 0.020  |
| <sup>111</sup> Cd  | 5.8       | 0.13   | 6.12         | 0.28   | 5.77         | 0.24   | 5.84         | 0.22   | 6.09          | 0.14   |
| <sup>121</sup> Sb  | 54.9      | 0.39   | 50.0         | 1.2    | 54.7         | 1.0    | 49.1         | 1.6    | 59.3          | 0.6    |
| <sup>128</sup> Te  | 1.0       | 0.0082 | 0.89         | 0.03   | 0.95         | 0.05   | 0.889        | 0.012  | 1.046         | 0.024  |
| <sup>137</sup> Ba  | 513       | 7      | 510          | 6      | 535          | 6      | 498          | 16     | 512           | 8      |
| <sup>138</sup> Ba  | 513       | 7      | 540          | 14     | 500          | 8      | 490          | 14     | 511           | 16     |
| <sup>205</sup> Tl  | 6.82      | 0.03   | 6.84         | 0.22   | 7.32         | 0.26   | 7.0          | 0.4    | 7.32          | 0.18   |
| <sup>208</sup> Pb  | 18.30     | 0.08   | 17.67        | 0.20   | 18.9         | 0.5    | 17.7         | 0.8    | 18.13         | 0.22   |
| <sup>209</sup> Pb  | 12.50     | 0.10   | 12.6         | 0.3    | 13.3         | 0.5    | 12.3         | 0.4    | 13.21         | 0.18   |
| <sup>238</sup> U   | _a        |        | 0.0063       | 0.0013 | 0.0052       | 0.0010 | 0.0055       | 0.0004 | 0.0049        | 0.0006 |

<sup>a</sup> not available, <sup>b</sup> not determined, <sup>c</sup> detector saturation

Table S8: Quantification overview for NIST 1643f with tenfold dilution for external calibration and standard addition using solution nebulization (SN) and desolvated sample introduction (Des). All values are reported in  $\mu\text{g kg}^{-1}$ .

| Quantified Isotope | Reference      |        | SN Ext. Cal.   |      | SN Std. Add.   |      | Des Ext. Cal |        | Des Std. Add.  |        |
|--------------------|----------------|--------|----------------|------|----------------|------|--------------|--------|----------------|--------|
|                    | mean           | 2SD    | mean           | 2SD  | mean           | 2SD  | mean         | 2SD    | mean           | 2SD    |
| <sup>7</sup> Li    | 16.4           | 0.4    | 15.8           | 0.8  | 16.7           | 0.8  | 17.4         | 1.2    | 15.7           | 0.6    |
| <sup>9</sup> Be    | 13.53          | 0.11   | 12.3           | 2.0  | 13.0           | 1.8  | 12.4         | 0.8    | 12.4           | 0.4    |
| <sup>11</sup> B    | 151            | 7      | 150            | 10   | 141            | 5    | (128)        |        | (124)          |        |
| <sup>23</sup> Na   | 18640          | 240    | 19900          | 1100 | - <sup>c</sup> |      | 18900        | 1400   | - <sup>c</sup> |        |
| <sup>24</sup> Mg   | 7380           | 60     | 6910           | 180  | - <sup>c</sup> |      | 7390         | 260    | - <sup>c</sup> |        |
| <sup>25</sup> Mg   | 7380           | 60     | 7740           | 240  | - <sup>c</sup> |      | 7480         | 200    | - <sup>c</sup> |        |
| <sup>27</sup> Al   | 132.5          | 1.2    | 134            | 5    | 144.6          | 3.0  | 130          | 4      | 124            | 2.2    |
| <sup>39</sup> K    | 1913           | 9      | 2040           | 60   | - <sup>c</sup> |      | 1890         | 70     | - <sup>c</sup> |        |
| <sup>40</sup> Ca   | 29140          | 300    | 29700          | 800  | - <sup>c</sup> |      | 29200        | 1000   | - <sup>c</sup> |        |
| <sup>41</sup> K    | 1913           | 9      | 1950           | 50   | - <sup>c</sup> |      | 1910         | 100    | - <sup>c</sup> |        |
| <sup>51</sup> V    | 35.71          | 0.27   | 34.5           | 1.2  | 36.27          | 0.26 | 36.2         | 1.0    | 35.31          | 0.26   |
| <sup>52</sup> Cr   | 18.3           | 0.1    | 18.3           | 0.8  | 18.7           | 0.3  | 18.7         | 0.4    | 18.06          | 0.12   |
| <sup>53</sup> Cr   | 18.3           | 0.1    | 17.9           | 0.6  | 18.3           | 1.2  | 18.1         | 0.3    | 17.62          | 0.22   |
| <sup>55</sup> Mn   | 36.8           | 0.6    | 35.9           | 1.0  | 36.23          | 0.16 | 35.8         | 0.8    | 34.9           | 0.4    |
| <sup>56</sup> Fe   | 92.5           | 0.8    | 95.4           | 2.6  | 96.6           | 1.0  | 92           | 4      | 83.5           | 2.4    |
| <sup>57</sup> Fe   | 92.5           | 0.8    | 172            | 8    | 257.2          | 6    | 141          | 12     | 151            | 3      |
| <sup>59</sup> Co   | 25.05          | 0.17   | 24.4           | 0.8  | 25.3           | 0.4  | 25.5         | 1.2    | 27.0           | 0.5    |
| <sup>60</sup> Ni   | 59.2           | 1.4    | 56.8           | 1.8  | 60.5           | 2.0  | 59.2         | 2.2    | 63.1           | 1.4    |
| <sup>62</sup> Ni   | 59.2           | 1.4    | 57.1           | 2.4  | 58.5           | 1.4  | 59.0         | 2.6    | 62.4           | 1.8    |
| <sup>63</sup> Cu   | 21.4           | 0.7    | 18.6           | 1.0  | 21.5           | 0.4  | 19.9         | 0.4    | 23.17          | 0.28   |
| <sup>64</sup> Zn   | 73.7           | 1.7    | 75.8           | 1.8  | 75.0           | 1.4  | 76.2         | 2.2    | 83.2           | 1.8    |
| <sup>65</sup> Cu   | 21.4           | 0.7    | 19.0           | 0.6  | 22.0           | 1.0  | 19.6         | 0.8    | 22.2           | 0.4    |
| <sup>66</sup> Zn   | 73.7           | 1.7    | 75.6           | 2.6  | 72.1           | 2.0  | 74.5         | 3      | 78.3           | 2.0    |
| <sup>75</sup> As   | 56.9           | 0.4    | 55.0           | 2.2  | 55.5           | 1.8  | 52.4         | 1.2    | 55.9           | 0.5    |
| <sup>78</sup> Se   | 11.58          | 0.08   | 11.0           | 1.8  | 12.3           | 3.0  | 12.1         | 0.8    | 10.5           | 0.4    |
| <sup>80</sup> Se   | 11.58          | 0.08   | 11.1           | 1.2  | 11.3           | 1.4  | 12.1         | 0.5    | 10.1           | 0.8    |
| <sup>85</sup> Rb   | 12.51          | 0.12   | 12.7           | 0.5  | 12.80          | 0.18 | 12.62        | 0.14   | 13.39          | 0.16   |
| <sup>88</sup> Sr   | 311            | 18     | 291            | 8    | 320            | 6    | 291          | 6      | 293            | 10     |
| <sup>95</sup> Mo   | 114.2          | 1.7    | 107.4          | 2.2  | 112.0          | 1.6  | 109.3        | 2.0    | 106.3          | 1.8    |
| <sup>98</sup> Mo   | 114.2          | 1.7    | 107.3          | 3.0  | 114.0          | 2.2  | 109          | 5      | 101.9          | 2.0    |
| <sup>107</sup> Ag  | 0.961          | 0.008  | 0.97           | 0.06 | 0.95           | 0.10 | 0.95         | 0.03   | 0.88           | 0.03   |
| <sup>109</sup> Ag  | 0.961          | 0.008  | 1.02           | 0.06 | 1.00           | 0.10 | 1.01         | 0.03   | 0.935          | 0.024  |
| <sup>111</sup> Cd  | 5.8            | 0.13   | 5.9            | 0.4  | 6.0            | 0.5  | 5.9          | 0.3    | 5.9            | 0.3    |
| <sup>121</sup> Sb  | 54.9           | 0.39   | 48.3           | 2.0  | 54.2           | 0.4  | 49.1         | 1.2    | 59.1           | 0.8    |
| <sup>128</sup> Te  | 1.0            | 0.0082 | 0.85           | 0.12 | 0.94           | 0.08 | 0.83         | 0.08   | 1.05           | 0.06   |
| <sup>137</sup> Ba  | 513            | 7      | 510            | 5    | 558            | 5    | 504          | 20     | 468            | 8      |
| <sup>138</sup> Ba  | 513            | 7      | 521            | 16   | 528            | 4    | 479          | 26     | 463            | 16     |
| <sup>205</sup> Tl  | 6.82           | 0.03   | 6.80           | 0.22 | 7.02           | 0.22 | 7.4          | 0.3    | 7.27           | 0.22   |
| <sup>208</sup> Pb  | 18.30          | 0.08   | 17.66          | 0.22 | 19.2           | 0.4  | 18.6         | 0.8    | 18.1           | 0.6    |
| <sup>209</sup> Pb  | 12.50          | 0.10   | 12.6           | 0.4  | 12.8           | 0.4  | 12.4         | 0.8    | 13.3           | 0.6    |
| <sup>238</sup> U   | - <sup>a</sup> |        | - <sup>b</sup> |      | - <sup>b</sup> |      | 0.0052       | 0.0006 | 0.0067         | 0.0014 |

<sup>a</sup> not available, <sup>b</sup> below LOQ, <sup>c</sup> not determined

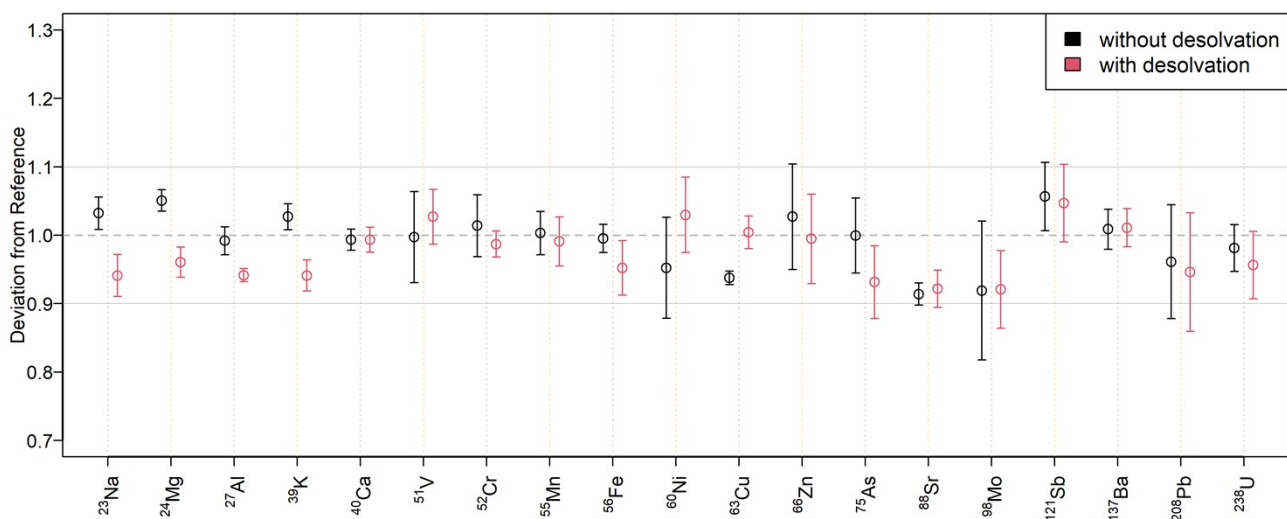

Figure S3: Quantification overview obtained with a twofold dilution of SLRS-6 for solution nebulization (black) and aerosol desolvation (red) using external calibration. For each isotope, the deviation of the obtained mass fractions from the certified reference material is given with error bars representing two times the standard deviation. The grey horizontal lines correspond to a difference of  $\pm 10\%$  from the certified value.

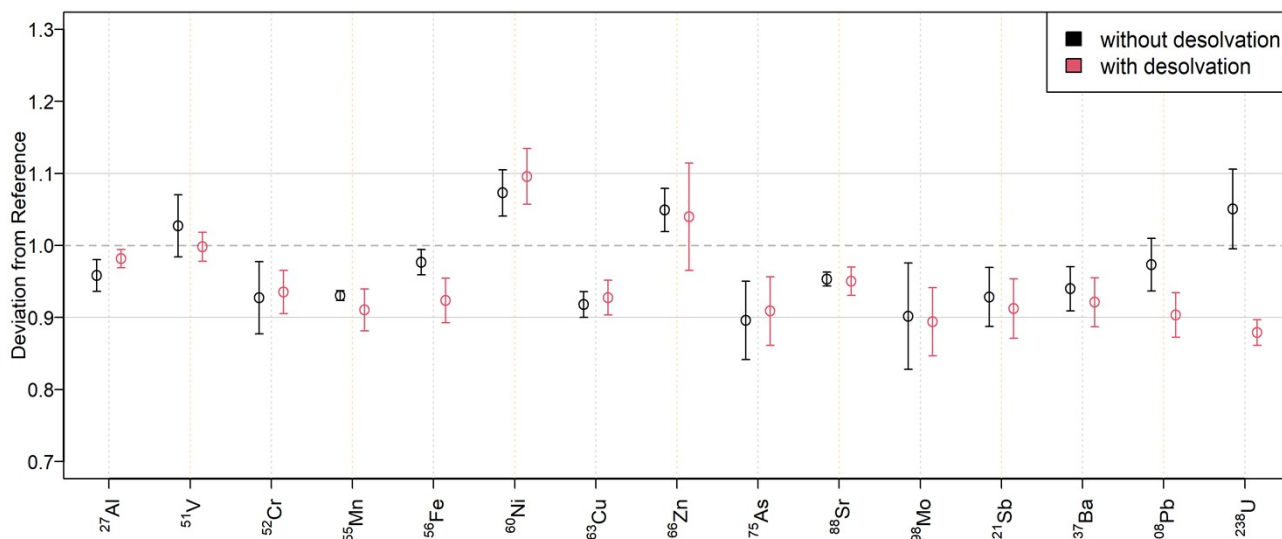

Figure S4: Quantification overview obtained with a twofold dilution of SLRS-6 for solution nebulization (black) and aerosol desolvation (red) using standard addition. For each isotope, the deviation of the obtained mass fractions from the certified reference material is given with error bars representing two times the standard deviation. The grey horizontal lines correspond to a difference of  $\pm 10\%$  from the certified value.



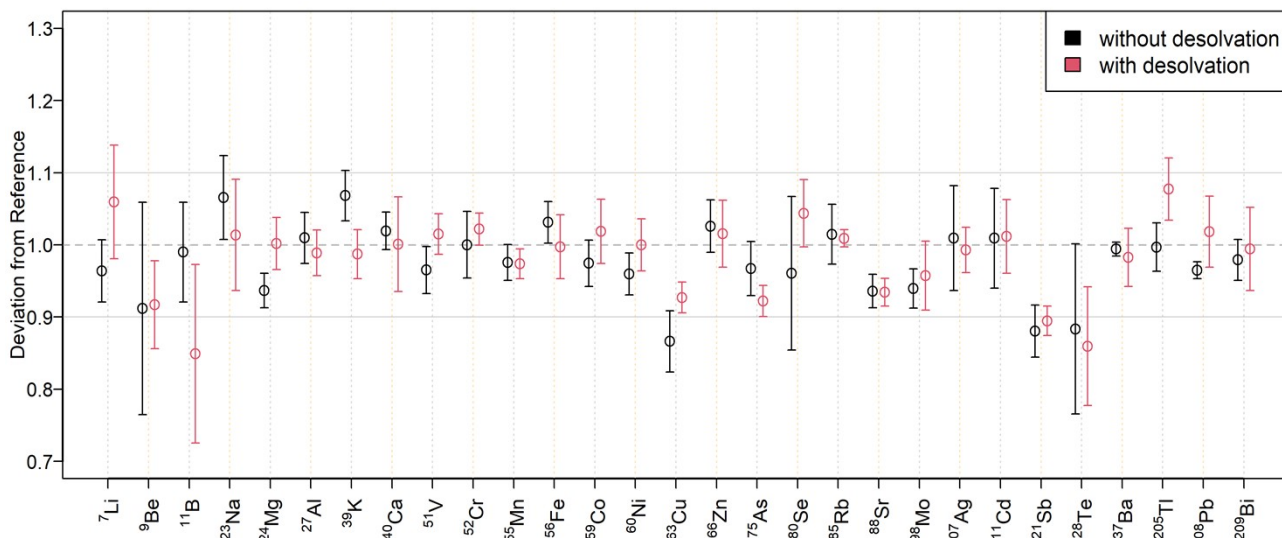

Figure S5: Quantification overview obtained with a tenfold dilution of NIST-1643f for solution nebulization (black) and aerosol desolvation (red) using external calibration. For each isotope, the deviation of the obtained mass fractions from the certified reference material is given with error bars representing two times the standard deviation. The grey horizontal lines correspond to a difference of  $\pm 10\%$  from the certified value.

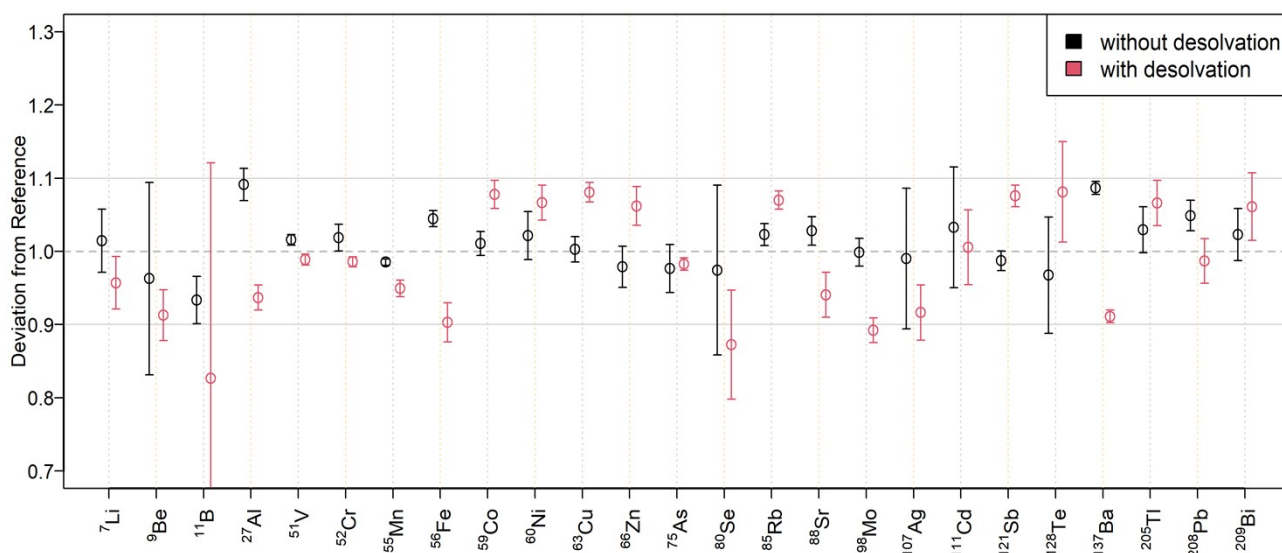

Figure S6: Quantification overview obtained with a tenfold dilution of NIST-1643f for solution nebulization (black) and aerosol desolvation (red) using standard addition. For each isotope, the deviation of the obtained mass fractions from the certified reference material is given with error bars representing two times the standard deviation. The grey horizontal lines correspond to a difference of  $\pm 10\%$  from the certified value.
